# Supplementary material
Source: PubMed Central journal article supplement (PMC3350610)
Supplement: NIHMS356308-supplement-01.pdf [file NIHMS356308-supplement-01.pdf]

## **Supplementary Material**

for the manuscript entitled

### **Sulfonated Ni(II)porphyrin improves the detection of Z-DNA in condensed and non-condensed BZB DNA sequences.**

Andrea E. Holmes<sup>a</sup>, Jung Kyu Choi<sup>c</sup>, Jacob Francis<sup>a</sup>, Alessandro D'Urso<sup>a,b,\*</sup>,  
Milan Balaz<sup>c,\*</sup>

<sup>a</sup> Department of Chemistry, Doane College, 1014 Boswell Ave, Crete, NE 68333, USA

<sup>b</sup> Dipartimento di Chimica, Università degli studi di Catania, Viale A. Doria 6, 95125 Catania, Italy

<sup>c</sup> Department of Chemistry, University of Wyoming, 1000 E University Ave, Laramie, WY 82071, USA

#### **\* Corresponding Authors**

Prof. Milan Balaz

Tel. +1 307 766 4330

Fax +1 307 766 2807

Email: [mbalaz@uwyo.edu](mailto:mbalaz@uwyo.edu)

Dr. Alessandro D'Urso

Tel. +39 0957385097

Fax +39 095508138

Email: [adurso@unict.it](mailto:adurso@unict.it)

**Materials.** Oligodeoxynucleotides were purchased from AlphaDNA, the anionic Nickel(II) porphyrin (**NiTPPS**) from Frontier Scientific, and sodium cacodylate and nickel(II) chloride from Sigma-Aldrich. All solutions were prepared using ultrapure water with a resistivity of 18.2 M $\Omega$ ·cm obtained from Milli-Q system. Oligonucleotides were dissolved in a sodium cacodylate buffer (1 mM, pH 7.0), annealed at 80 °C for 20 min, cooled at 1 °C/min, and kept at 4 °C. The concentration of the DNA stock solutions was quantified by UV-vis absorption spectroscopy. The concentration of ODNs is per base pair. The B- to Z-DNA transition was induced at room temperature using (a) NiCl<sub>2</sub> or (b) spermine + NiCl<sub>2</sub>.

**Circular Dichroism Spectroscopy.** CD spectra were recorded at 20 °C using a Jasco J-815 spectropolarimeter equipped with a single position Peltier temperature control system. Conditions were as follows: scanning speed 50 nm/min, data pitch 0.5 nm, DIT 2 s, and bandwidth 1 nm. A quartz cuvette with a 1 cm path length was used for all CD experiments. Each CD spectrum was an average of at least three scans. The CD spectrum of corresponding blank was always subtracted from the CD spectrum of the sample.

**UV-Vis Absorption Spectroscopy.** UV-vis absorption spectra were collected at 20 °C using a Jasco V-650 or a Jasco V-530 UV-vis double beam spectrophotometer equipped with a single position Peltier temperature control system. A quartz cuvette with a 1 cm path length was used for all UV-vis experiments.

**Resonance Light Scattering.** Resonance light scattering data were recorded at 20 °C using a Varian Cary Eclipse fluorescence spectrophotometer equipped with a Peltier temperature control system in a synchronous scan mode. Conditions were as follows: excitation slit 2.5 nm, emission slit 2.5 nm, scan rate 600 nm/min.

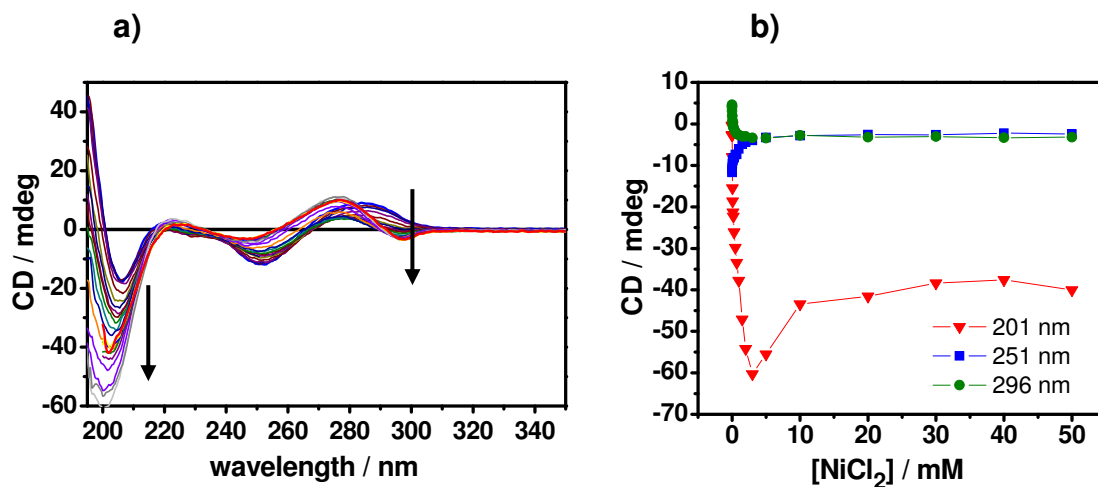

**Fig. S1.** a) CD spectra of NiCl<sub>2</sub> titration of **BZ** (100 μM) in Na-cacodylate buffer (1 mM, pH = 7.0). b) CD intensity at 201 nm (red triangles), 251 nm (blue squares) and 296 nm (green circles) as a function of NiCl<sub>2</sub> concentration.

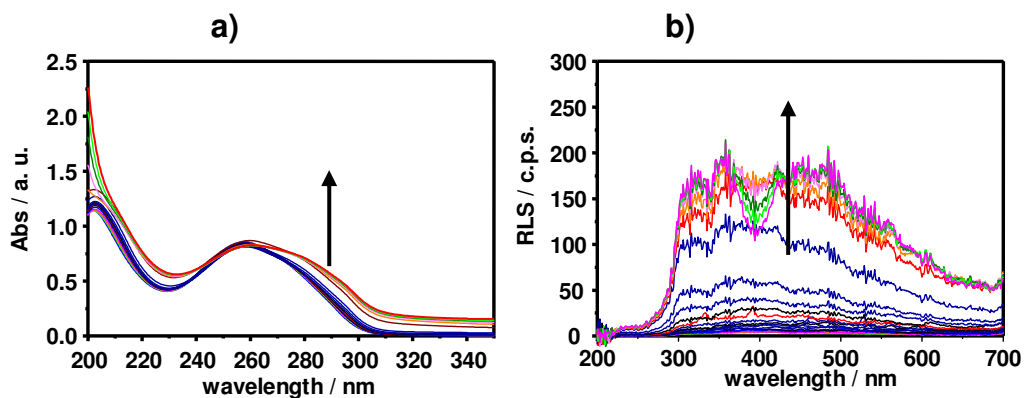

**Fig. S2.** a) UV and b) RLS spectra of NiCl<sub>2</sub> titration of **BZ** (100 μM) in Na-cacodylate buffer (1 mM, pH = 7.0). Arrows indicate the direction of increasing concentration of NiCl<sub>2</sub>.

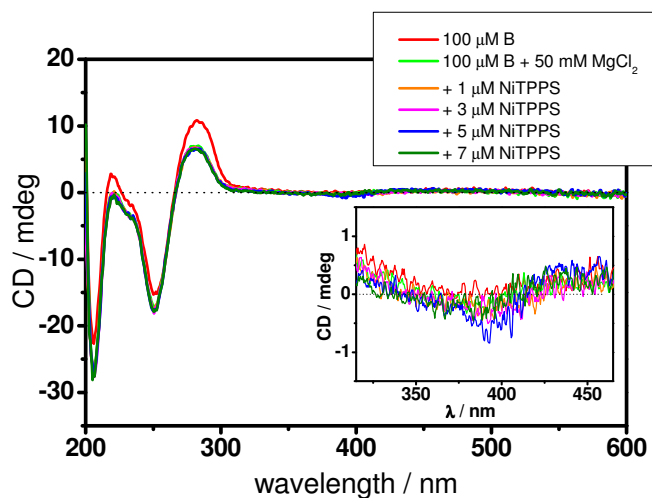

**Fig. S3.** CD spectra of **B** (100  $\mu\text{M}$  + 50 mM  $\text{MgCl}_2$ ) with increasing concentration of **NiTPPS**: from 1  $\mu\text{M}$  to 7  $\mu\text{M}$ . Inset show a zoom of ICD signal of **NiTPPS**.

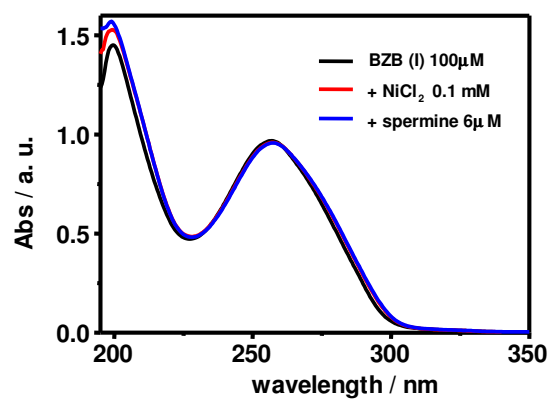

**Fig. S4.** UV-vis absorption spectra of **BZB(I)** (100  $\mu\text{M}$ , black curve) in Na-cacodylate buffer (1 mM, pH = 7.0), in the presence of  $\text{NiCl}_2$  (100  $\mu\text{M}$ , red curve), and in the presence of  $\text{NiCl}_2$  (100  $\mu\text{M}$ ) + spermine (6  $\mu\text{M}$ , blue curve).

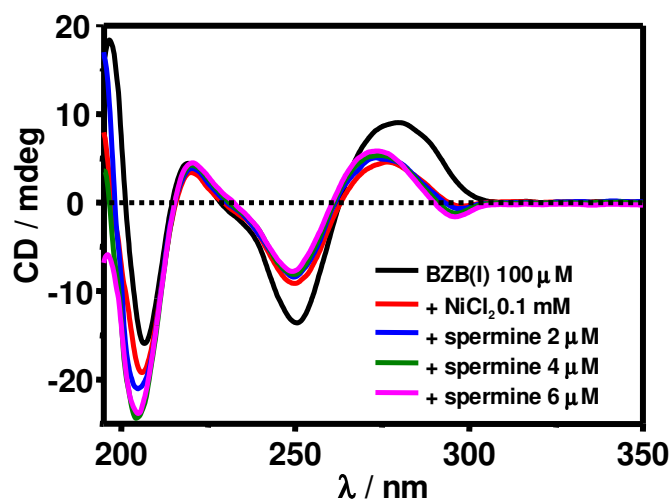

**Fig. S5.** CD spectra of **BZB(I)** (100  $\mu\text{M}$ , black curve) in cacodylate buffer (1 mM, pH = 7.0), in the presence of  $\text{NiCl}_2$  (100  $\mu\text{M}$ , red curve), and  $\text{NiCl}_2$  (100  $\mu\text{M}$ ) + spermine (from 2  $\mu\text{M}$  to 6  $\mu\text{M}$ ).

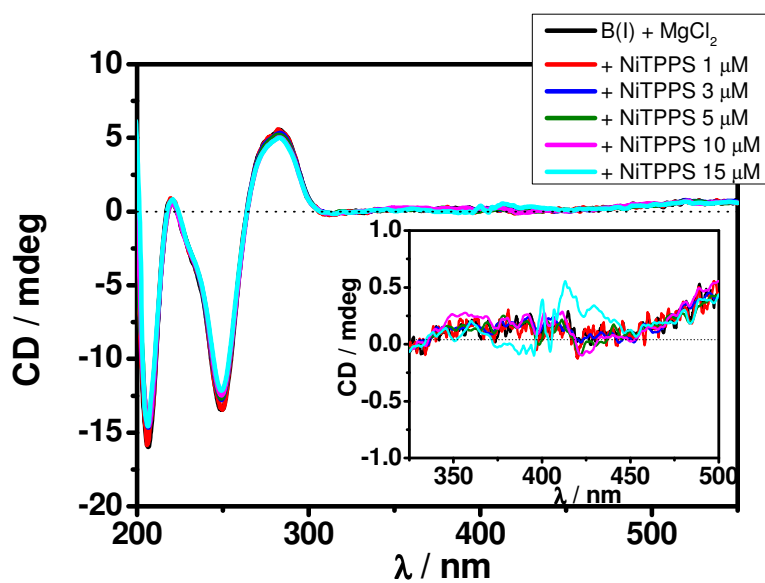

**Fig. S6.** CD spectra of **B(I)** (100  $\mu\text{M}$  + 50 mM  $\text{MgCl}_2$ ) with increasing concentration of **NiTPPS**: from 1  $\mu\text{M}$  to 15  $\mu\text{M}$ . Inset show a zoom of ICD signal of **NiTPPS**.

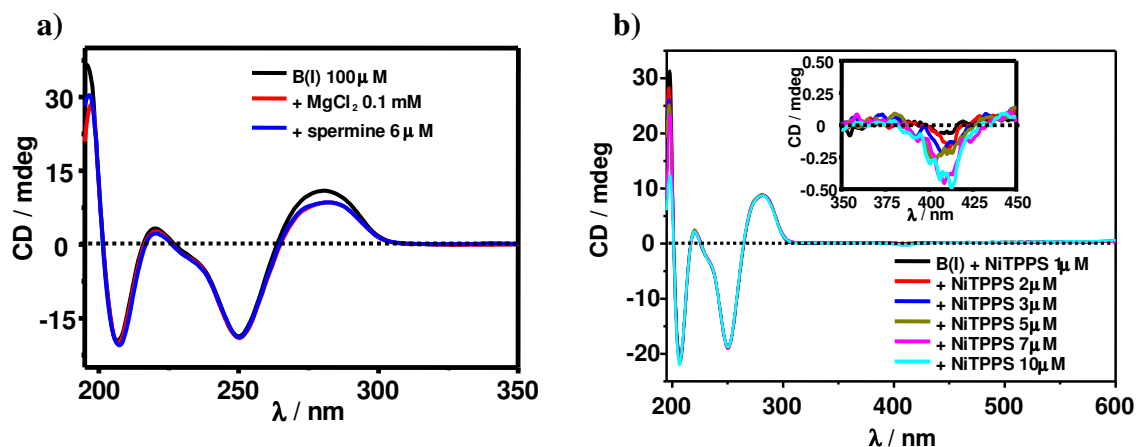

**Fig. S7.** a) CD spectra of **B(I)** (100  $\mu\text{M}$ ) in cacodylate buffer (1 mM, pH = 7.0) before (black curve), after addition of  $\text{MgCl}_2$  (0.1 mM, red curve), and subsequent addition of spermine (6  $\mu\text{M}$ , blue curve); b) CD spectra of **B(I)** (100  $\mu\text{M}$  + 50 mM  $\text{MgCl}_2$ ) with increasing concentration of **NiTPPS**: from 1  $\mu\text{M}$  to 10  $\mu\text{M}$ . Inset show a zoom of ICD signal of **NiTPPS**.

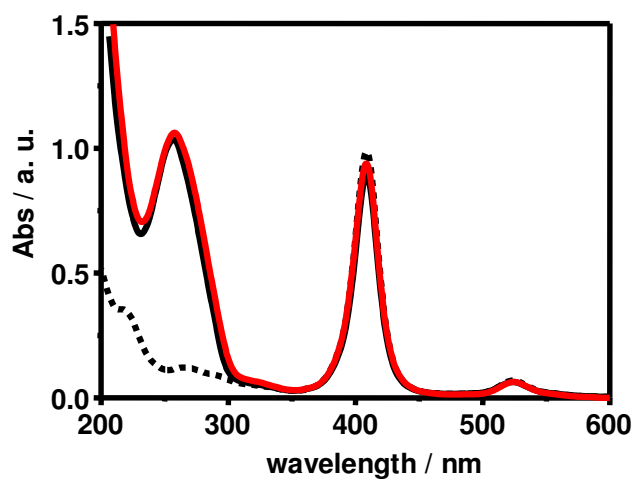

**Fig. S8.** UV-vis absorption spectra of **NiTPPS** (5  $\mu\text{M}$ , black dashed curve) in the presence of **B(I)** (100  $\mu\text{M}$  + 100  $\mu\text{M}$   $\text{MgCl}_2$  + 6  $\mu\text{M}$  spermine, black curve), and in the presence of **BZB(I)** (100  $\mu\text{M}$  + 100  $\mu\text{M}$   $\text{NiCl}_2$  + 6  $\mu\text{M}$  spermine, red curve).

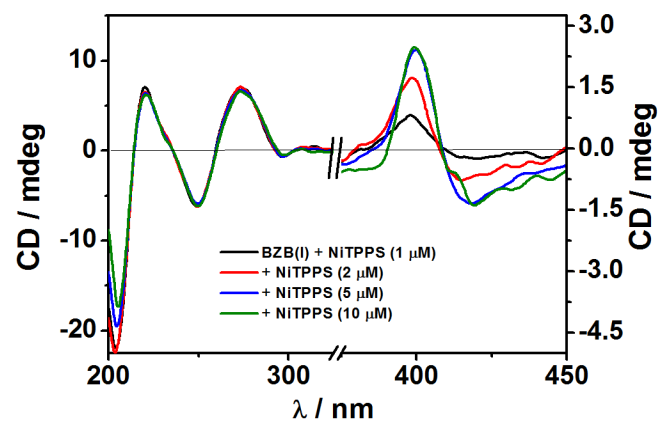

**Fig. S9.** CD spectra of **BZB(I)** (100  $\mu\text{M}$  + 100  $\mu\text{M}$   $\text{NiCl}_2$  + 6  $\mu\text{M}$  spermine) in Na-cacodylate buffer (1 mM, pH = 7.0) with increasing concentration of **NiTPPS**: 1  $\mu\text{M}$  (black curve), 2  $\mu\text{M}$  (red curve), 5  $\mu\text{M}$  (blue curve) and 10  $\mu\text{M}$  (green curve).
